# Supplementary material for: Extraction and preconcentration of parabens in liquid pharmaceutical samples by Dispersive Liquid-Liquid Microextraction based on deep eutectic solvent
Source: Research Square preprint supplement (doi:10.21203/rs.3.rs-1337548/v1), 2022-02-11
Supplement: Supplementary file 1 [file 470c6085a13df5b3acce37fb.xlsx]

## Sheet: Kind of DES new
DES	MP	EP	PP	BP
MC	89	108.81	163.31	106.65
EGC	42.48	64.18	61.07	57.07
MEGCFe	71.43	78.75	84.09	63.57
GCW	91.52	142.41	191.36	306.16
PC	71.6	91.8	97.36	321.18
ccl4 200	57.3	75.91	49.82	105.78
GLYC	88.91	82.41	126.51	314.36
MD	75.54	90.12	139.19	94.76
MA	81.09	96.9	143.7	89.11
DES	MP	EP	PP	BP
MC	1.41	3.45	4.24	2.13
EGC	4.32	4.35	3.41	1.41
MEGCFe	5.09	4.41	2.12	7.27
GCW	2.27	3.26	6.47	5.16
PC	3.06	5.87	6.18	9.01
ccl4 200	2.56	3.11	1.11	4.07
GLYC	4.37	2.43	5.46	7.13
MD	2.21	2.43	5.23	3.25
MA	1.91	3.35	4.31	2.19
